# Supplementary material for: Non-oxidative coupling of methane catalysed by supported tungsten hydride onto alumina and silica–alumina in classical and H2 permeable membrane fixed-bed reactors
Source: Royal Society of Chemistry journal article supplement (doi:10.1039/c0cc00007h), 2010-01-01
Supplement: c0cc00007h.pdf [file c0cc00007h.pdf]

## **Supplementary Material**

### **Non-Oxidative Coupling of Methane Catalysed by Supported Tungsten Hydride onto Alumina and Silica-Alumina in a Classical and H<sub>2</sub> Permeable Membrane Fixed-Bed Reactors**

**Kai C. Szeto,<sup>a</sup> Sébastien Norsic,<sup>a</sup> Lucie Hardou,<sup>a</sup> Anne Baudouin,<sup>a</sup> Jean Thivolle-Cazat,<sup>a</sup> Erwan Le Roux,<sup>a</sup> Sudhakar Chakka,<sup>b</sup> Charalambos Papaioannou,<sup>b</sup> Jean-Marie Basset,<sup>\*a</sup> Mostafa Taoufik<sup>\*a</sup>**

<sup>a</sup> *Université Lyon 1, Institut de Chimie Lyon, CPE Lyon, CNRS, UMR 5265 C2P2, LCOMS, Bâtiment 308 F, 43 Blvd du 11 Novembre 1918, F-69616 Villeurbanne Cedex, France. Fax: +33 (0)472431795; Tel: +33 (0)472431798; E-mail: taoufik@cpe.fr, basset@cpe.fr*

<sup>b</sup> *BP Products North America Inc., 150 W Warrenville Road, IL 60563, Naperville, USA.*

## Experimental Details

**General procedures.** All experiments were carried out under controlled atmosphere, using Schlenk techniques and glove box for preparation or handling of organometallic compounds.  $\gamma$ -Alumina and silica-alumina were purchased from Degussa and Akzo-Nobel, respectively.  $\gamma$ -Alumina and silica-alumina supported tungsten hydride were prepared as already reported.<sup>1,2</sup>

IR spectra were recorded on a Nicolet 550-FT spectrophotometer in transmission mode by using an infrared cell equipped with  $\text{CaF}_2$  windows, allowing *in situ* studies. Solid-state NMR spectra were recorded on a Bruker DSX-300 spectrometer equipped with a standard 4-mm double-bearing probe head and operating at 75.47, 300.18 MHz for  $^{13}\text{C}$  and  $^1\text{H}$  respectively.

**Representative catalytic conversion of methane procedure.** In a glove box, the tungsten hydride supported on  $\gamma$ -alumina (500 mg; 4 wt% W) or silica-alumina (300 mg; 7 wt% W) were loaded into a stainless steel  $\frac{1}{2}$ " cylinder reactor and the amount of catalyst was adjusted to be  $1.2 \text{ mol}_{\text{CH}_4} \text{ mol}_\text{W}^{-1} \text{ min}^{-1}$ . Catalytic conversion of methane was carried out in fixed-bed type stainless steel reactors at  $350^\circ\text{C}$  and 50 bar which was connected to a Varian CP-4900  $\mu$ -GC for product determination (fitted with 10 m x 0.32 mm capillary columns: an  $\text{Al}_2\text{O}_3/\text{KCl}$ , for hydrocarbons and a molecular sieve 5 Å, for hydrogen, both with a catharometer detector). Only pure methane (purity 99.999%, from air liquid) was fed through the reactor at  $3 \text{ mL min}^{-1}$ . For the fixed-bed reactor equipped with the  $\text{H}_2$  selective membrane based on Pd-Ag, the membrane was purchased from *REB Research & Consulting*. The membrane was installed as high pressure cylindrical tubes in the metallic reactor. Hence, the catalyst surrounded the membrane tubes. Catalytic conversion occurred when methane was flowed through the reactor. Hydrogen produced from the reaction diffused selectively through the membrane tubes and then removed by a sweep gas (argon was used). Additional experiments suggested that the optimal permeability was to apply a self supported pressure of the sweep gas at 30 bars and a flow rate at  $30 \text{ ml min}^{-1}$ .

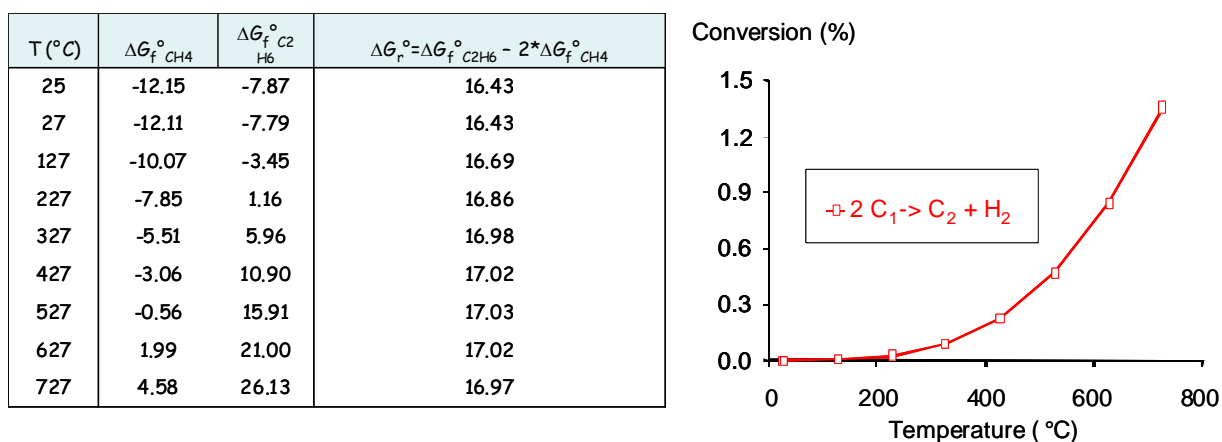

**Fig. S1** Thermodynamic data (Gibbs energy and corresponding equilibrium conversion *versus* temperature) of the NOCM reaction.

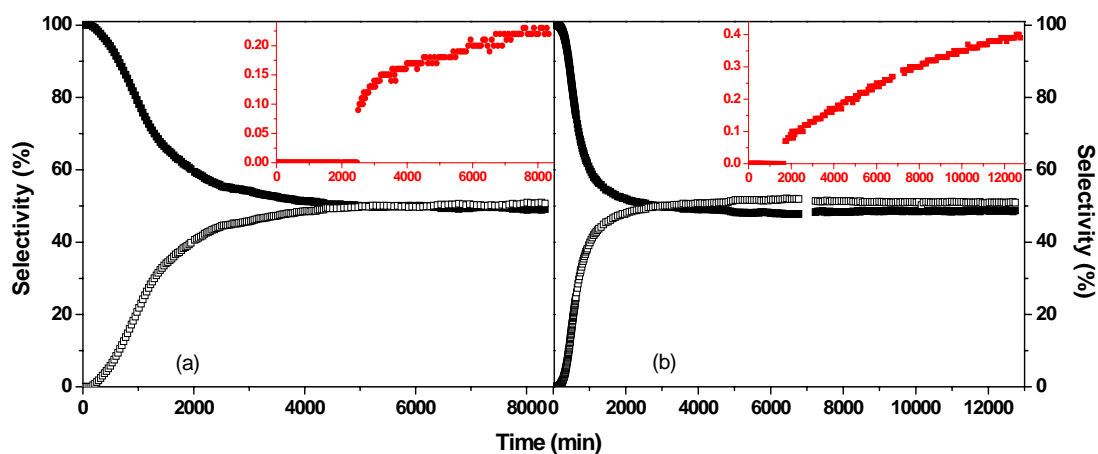

**Fig. S2** Product distribution of NOCM catalysed by (a) W-H@SiO<sub>2</sub>-Al<sub>2</sub>O<sub>3</sub> and (b) W-H@γ-Al<sub>2</sub>O<sub>3</sub> (top black curve: H<sub>2</sub>; bottom black curve C<sub>2</sub>; red curves: C<sub>3</sub> selectivity).

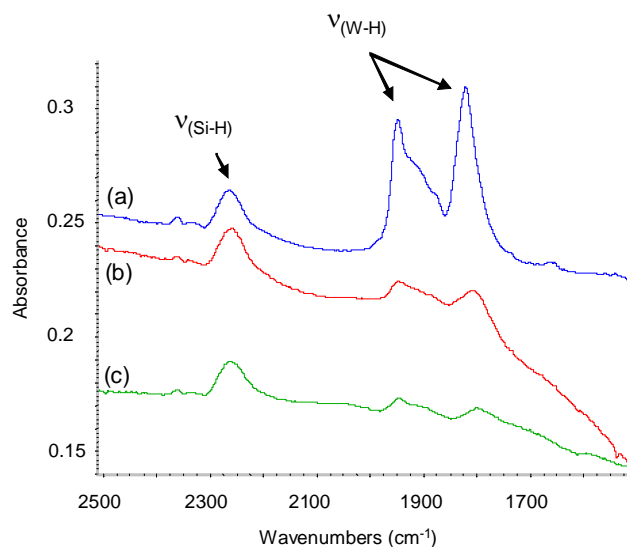

**Fig. S3** Activation of  $\text{CH}_4$  at  $150^\circ\text{C}$  on  $\text{W-H@SiO}_2\text{-Al}_2\text{O}_3$  monitoring by *in situ* IR spectroscopy. (a)  $\text{W-H@SiO}_2\text{-Al}_2\text{O}_3$ . (b) After activation of  $\text{CH}_4$  at  $150^\circ\text{C}$  on  $\text{W-H@SiO}_2\text{-Al}_2\text{O}_3$  during 5 h. (c) (b) After activation of  $\text{CH}_4$  at  $150^\circ\text{C}$  on  $\text{W-H@SiO}_2\text{-Al}_2\text{O}_3$  during 24 h.

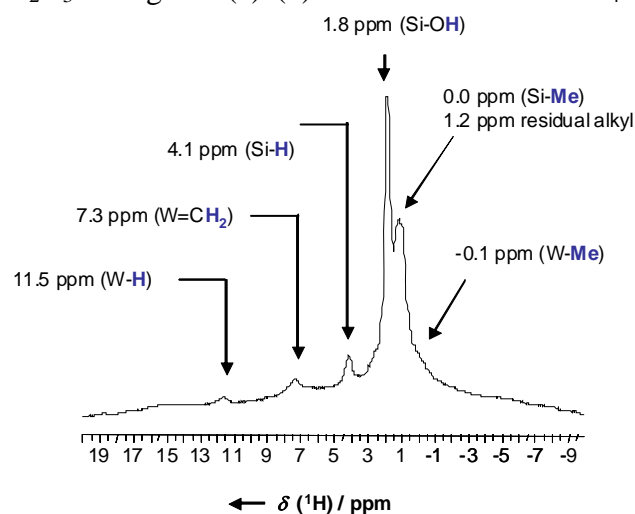

**Fig. S4** Solid-state  $^1\text{H}$  MAS NMR spectra of  $\text{W-H@SiO}_2\text{-Al}_2\text{O}_3$  obtained after  $^{13}\text{CH}_4$  activation at  $150^\circ\text{C}$  during 24 h (NS 8, D1 = 1 s, LB = 0 Hz).

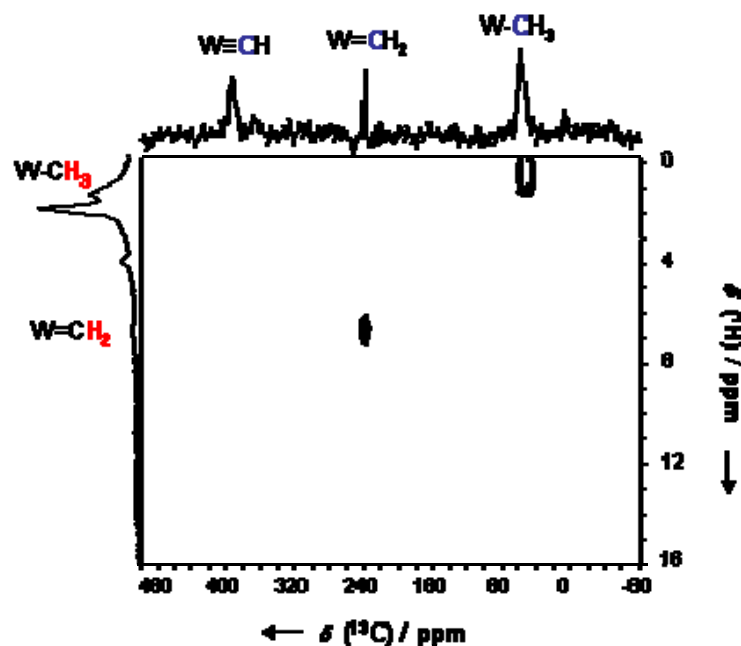

**Fig. S5**  $^1\text{H}$ - $^{13}\text{C}$  HETCOR solid-state NMR spectrum of  $\text{W-H@SiO}_2\text{-Al}_2\text{O}_3$  obtained after  $^{13}\text{CH}_4$  activation at  $150^\circ\text{C}$  during 24 h (NS 2048, D1 = 1 s, P15 = 5 ms, LB = 50 Hz).

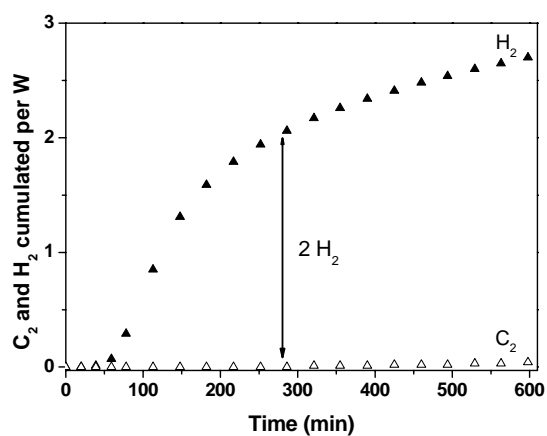

**Fig. S6** Evolution of products during the initiation period of the NOCM catalysed by W-H@SiO<sub>2</sub>-Al<sub>2</sub>O<sub>3</sub>.

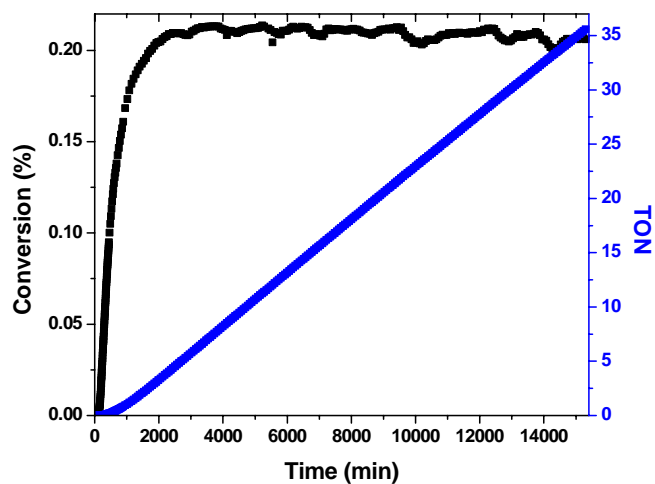

**Fig. S7** Catalytic performance of W-H@Al<sub>2</sub>O<sub>3</sub> in a fixed-bed reactor for long time.

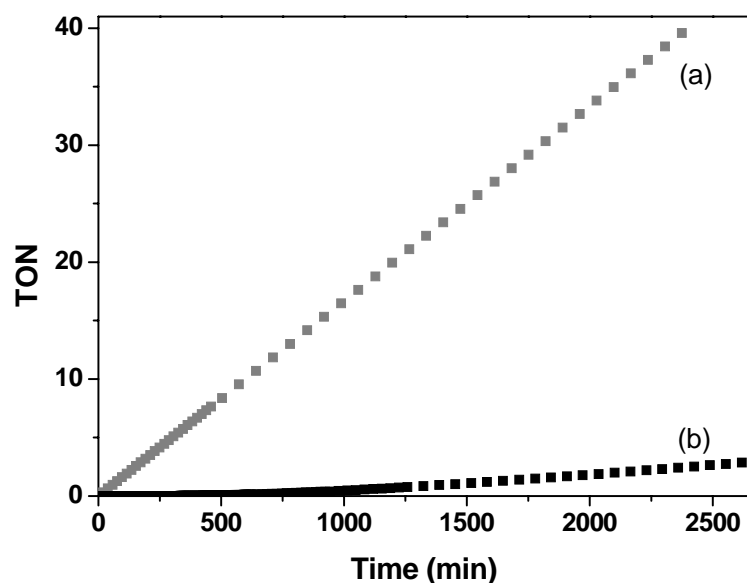

**Fig. S8** Catalytic performances of W-H@ $\gamma$ -Al<sub>2</sub>O<sub>3</sub> (a) equipped with Pd-Ag membrane and (b) without Pd-Ag membrane in a fixed-bed reactor for the NOCM.

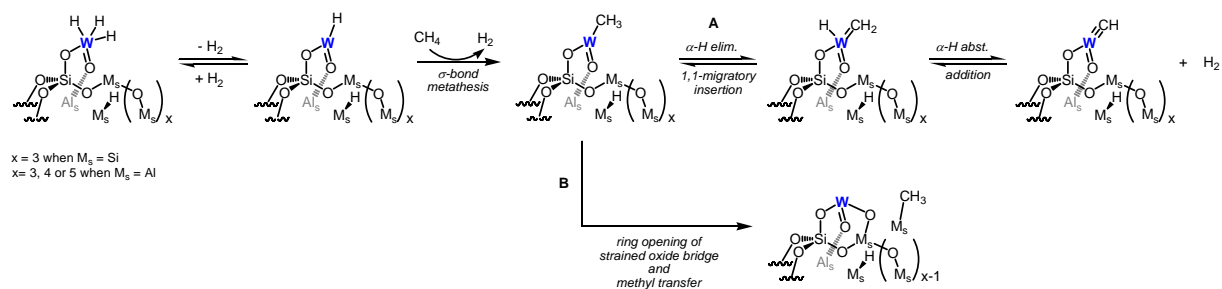

**Scheme S1** A) Reaction pathway leading to [W(=O)(Me)], by activation of CH<sub>4</sub> onto W-H@SiO<sub>2</sub>-Al<sub>2</sub>O<sub>3</sub>, and then to [W(=O)(=CH<sub>2</sub>)(H)] and [W(=O)(≡CH)] by subsequent  $\alpha$ -H elimination and  $\alpha$ -H abstraction. B) Reaction pathway leading to the formation of [(≡SiO)(M<sub>s</sub>)W(=O)] species along with (M<sub>s</sub>-Me) fragment upon treatment of W-H@SiO<sub>2</sub>-Al<sub>2</sub>O<sub>3</sub> under CH<sub>4</sub> at 150°C.

<sup>1</sup> E. Le Roux, M. Taoufik, C. Copéret, A. de Mallmann, J. Thivolle-Cazat, J. M. Basset, B. M. Maunders and G. J. Sunley, *Angew. Chem. Int. Ed.*, 2005, **44**, 6755-6758.

<sup>2</sup> E. Le Roux, M. Taoufik, A. Baudouin, C. Copéret, J. Thivolle-Cazat, J. M. Basset, B. M. Maunders and G. J. Sunley, *Adv. Synth. Catal.*, 2007, **349**, 231-237.
